# Supplementary material for: 2,2′-Biphen[n]arenes (n = 4–8): one-step, high-yield synthesis, and host–guest properties
Source: Royal Society of Chemistry journal article supplement (doi:10.1039/c7cc06767d), 2017-01-01
Supplement: c7cc06767d1.pdf [file c7cc06767d1.pdf]

Electronic supplementary information

**2,2'-Biphen[*n*]arenes (*n* = 4–8): one-step, high-yield  
synthesis and host–guest properties**

Lu Dai, Zhi-Jun Ding, Lei Cui, Jian Li, Xueshun Jia, and Chunju Li

Contents

|                                                                                       |     |
|---------------------------------------------------------------------------------------|-----|
| 1. Materials and methods.                                                             | S2  |
| 2. Synthesis of <b>2,2'-EtBP<math>n</math>s</b> .                                     | S2  |
| 3. Copies of $^1\text{H}$ NMR and $^{13}\text{C}$ NMR spectra of the new macrocycles. | S4  |
| 4. VT $^1\text{H}$ NMR spectra of <b>2,2'-EtBP4</b> and <b>2,2'-EtBP8</b> .           | S9  |
| 5. Additional $^1\text{H}$ NMR spectra of host-guest mixture.                         | S11 |
| 6. Molar ratio plots and determination of $K_a$ .                                     | S14 |
| 7. References.                                                                        | S20 |

## Experimental

### Materials and methods

Organic cationic guests  $1^+–4^{2+}$  with tetrakis[3,5-bis(trifluoromethyl)phenyl]borate counter anions were prepared from their chloride or bromide salts using our previously reported methods.<sup>[S1]</sup>  $^1\text{H}$  NMR and  $^{13}\text{C}$  NMR spectra were recorded on a Bruker AV500 instrument. High-resolution mass spectra (HRMS) were recorded on a Bruker Daltonics, Inc. APEXIII 7.0 TESLA FTMS instrument. Melting points were obtained on an X-4 digital melting point apparatus without correction.

### Synthesis of 2,2'-EtBPns

To the solution of 2,2'-diethoxybiphenyl (4.8 g, 20 mmol) in  $\text{CH}_2\text{ClCH}_2\text{Cl}$  (200 mL) was added paraformaldehyde (0.90 g, 30 mmol). Boron trifluoride diethyl etherate (5.0 ml, 40 mmol) was then added to the reaction mixture. The mixture was stirred at 25 °C for 30 minutes. Then the reaction was quenched by addition of 100 mL water. The organic phase was separated and washed with saturated aqueous  $\text{NaHCO}_3$ , and water. The organic layer was dried over anhydrous  $\text{Na}_2\text{SO}_4$  and concentrated. The residue was purified by column chromatography on silica gel (eluent: 10/1, v/v, Petroleum ether:ethyl acetate gradually changing to 2/1) to afford **2,2'-EtBP4** (0.80 g, 16%), **2,2'-EtBP5** (0.72 g, 14%), **2,2'-EtBP6** (0.42 g, 8.4%), **2,2'-EtBP7** (0.32 g, 6.4%), and **2,2'-EtBP8** (0.30 g, 5.9%) as white solids.

**2,2'-EtBP4.** m.p.108–110 °C.  $^1\text{H}$  NMR (500 MHz,  $\text{CDCl}_3$ ):  $\delta$  (ppm): 7.14–6.98 (m, 16H), 6.80 (d,  $J = 8.3$  Hz, 8H), 3.91 (q,  $J = 7.0$  Hz, 16H), 3.85 (s, 8H), 1.18 (t,  $J = 7.0$  Hz, 24H).  $^{13}\text{C}$  NMR (125 MHz,  $\text{CDCl}_3$ ):  $\delta$  (ppm): 154.8, 133.2, 132.3, 128.5, 128.3, 112.3 (C of biphenyl), 64.1 (C of methylene in ethoxy group), 40.4 (C of methylene bridge) 14.9 (C of methyl in ethoxy group). HRMS (ESI):  $\text{C}_{68}\text{H}_{72}\text{O}_8\text{Na}^+$ , calcd  $m/z$  1039.5104; found  $m/z$  1039.5117.

**2,2'-EtBP5.** m.p.86–88 °C.  $^1\text{H}$  NMR (500 MHz,  $\text{CDCl}_3$ ):  $\delta$  (ppm): 7.10–6.98 (m, 20H), 6.78 (d,  $J = 8.3$  Hz, 10H), 3.86 (dd,  $J = 13.9, 6.9$  Hz, 30H), 1.13 (t,  $J = 7.0$  Hz,30H).  $^{13}\text{C}$  NMR (125 MHz,  $\text{CDCl}_3$ ):  $\delta$  (ppm): 154.7, 133.1, 132.3, 128.4, 128.0, 112.4 (C of biphenyl), 64.0 (C of methylene in ethoxy group), 40.5 (C of methylene

bridge), 14.8 (C of methyl in ethoxy group). HRMS (ESI):  $C_{85}H_{90}O_{10}Na^+$ , calcd m/z 1293.6405; found m/z 1293.6234.

**2,2'-EtBP6.** m.p. 90–92 °C.  $^1H$  NMR (500 MHz,  $CDCl_3$ ):  $\delta$  (ppm): 7.08 (d,  $J = 2.2$  Hz, 12H), 7.03 (dd,  $J = 8.3, 2.2$  Hz, 12H), 6.78 (d,  $J = 8.4$  Hz, 12H), 3.85 (dd,  $J = 13.6, 6.6$  Hz, 36H), 1.12 (t,  $J = 7.0$  Hz, 36H).  $^{13}C$  NMR (125 MHz,  $CDCl_3$ ):  $\delta$  (ppm): 154.6, 133.1, 132.4, 128.4, 128.0, 112.4 (C of biphenyl), 64.0 (C of methylene in ethoxy group), 40.4 (C of methylene bridge), 14.8 (C of methyl in ethoxy group). HRMS (ESI):  $C_{102}H_{108}O_{12}Na^+$ , calcd m/z 1547.7706; found m/z 1547.7764.

**2,2'-EtBP7.** m.p. 97–100 °C.  $^1H$  NMR (500 MHz,  $CDCl_3$ ):  $\delta$  (ppm): 7.09 (d,  $J = 2.2$  Hz, 14H), 7.03 (dd,  $J = 8.3, 2.2$  Hz, 14H), 6.78 (d,  $J = 8.4$  Hz, 14H), 3.85 (dd,  $J = 13.8, 6.8$  Hz, 42H), 1.12 (t,  $J = 7.0$  Hz, 42H).  $^{13}C$  NMR (125 MHz,  $CDCl_3$ ):  $\delta$  (ppm): 154.6, 133.1, 132.3, 128.4, 127.9, 112.4 (C of biphenyl), 63.98 (C of methylene in ethoxy group), 40.4 (C of methylene bridge), 14.8 (C of methyl in ethoxy group). HRMS (ESI):  $C_{119}H_{126}O_{14}Na^+$ , calcd m/z 1802.9079; found m/z 1802.9056.

**2,2'-EtBP8.** m.p. 92–95 °C.  $^1H$  NMR (500 MHz,  $CDCl_3$ ):  $\delta$  (ppm): 7.10 (d,  $J = 2.2$  Hz, 16H), 7.03 (dd,  $J = 8.4, 2.2$  Hz, 16H), 6.78 (d,  $J = 8.4$  Hz, 16H), 3.86 (dd,  $J = 13.9, 6.9$  Hz, 48H), 1.12 (t,  $J = 7.0$  Hz, 48H).  $^{13}C$  NMR (125 MHz,  $CDCl_3$ )  $\delta$  (ppm): 154.6, 133.1, 132.4, 128.4, 128.0, 112.4 (C of biphenyl), 64.0 (C of methylene in ethoxy group), 40.4 (C of methylene bridge), 14.8 (C of methyl in ethoxy group). HRMS (ESI):  $C_{136}H_{144}O_{16}NH_4^+$ , calcd m/z 2052.0832; found m/z 2052.0833.

Copies of  $^1\text{H}$  NMR and  $^{13}\text{C}$  NMR spectra of the new macrocycles.

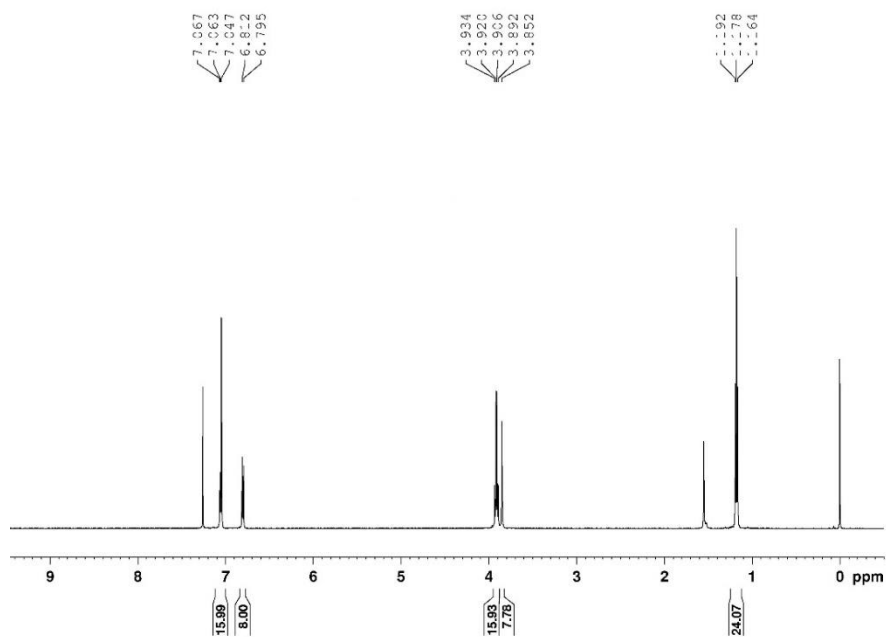

Figure S1.  $^1\text{H}$  NMR spectrum (500 MHz) of **2,2'-EtBP4** in  $\text{CDCl}_3$

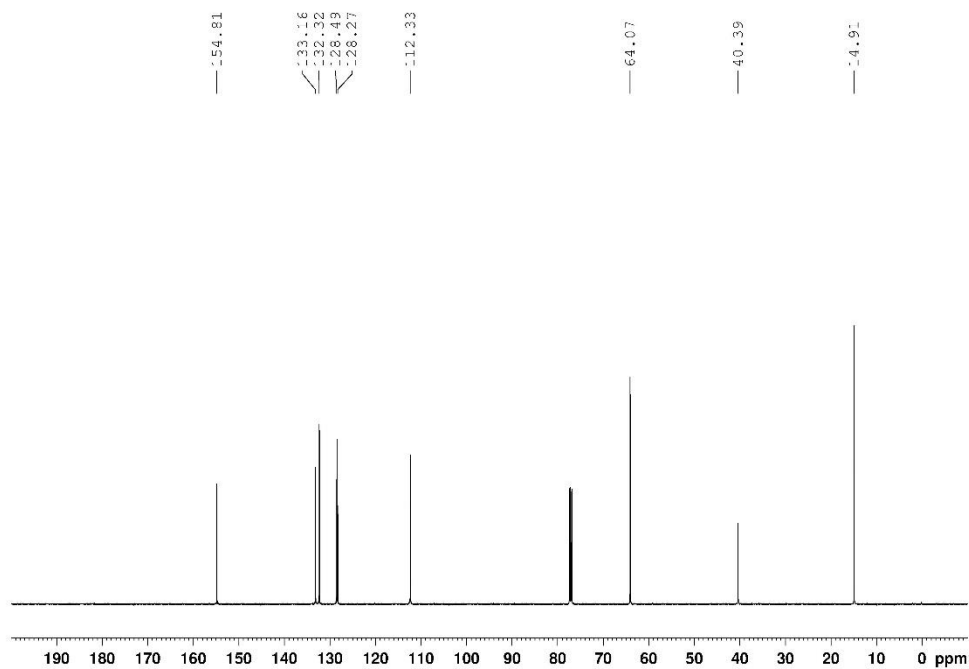

Figure S2.  $^{13}\text{C}$  NMR spectrum (125 MHz) of **2,2'-EtBP4** in  $\text{CDCl}_3$

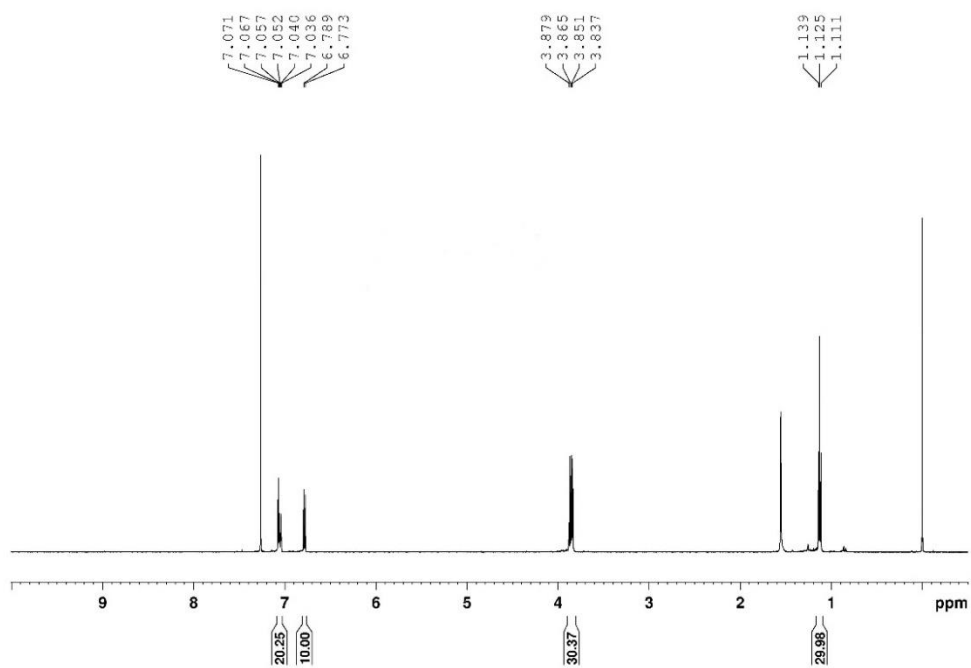

**Figure S3.**  $^1\text{H}$  NMR spectrum (500 MHz) of **2,2'-EtBP5** in  $\text{CDCl}_3$

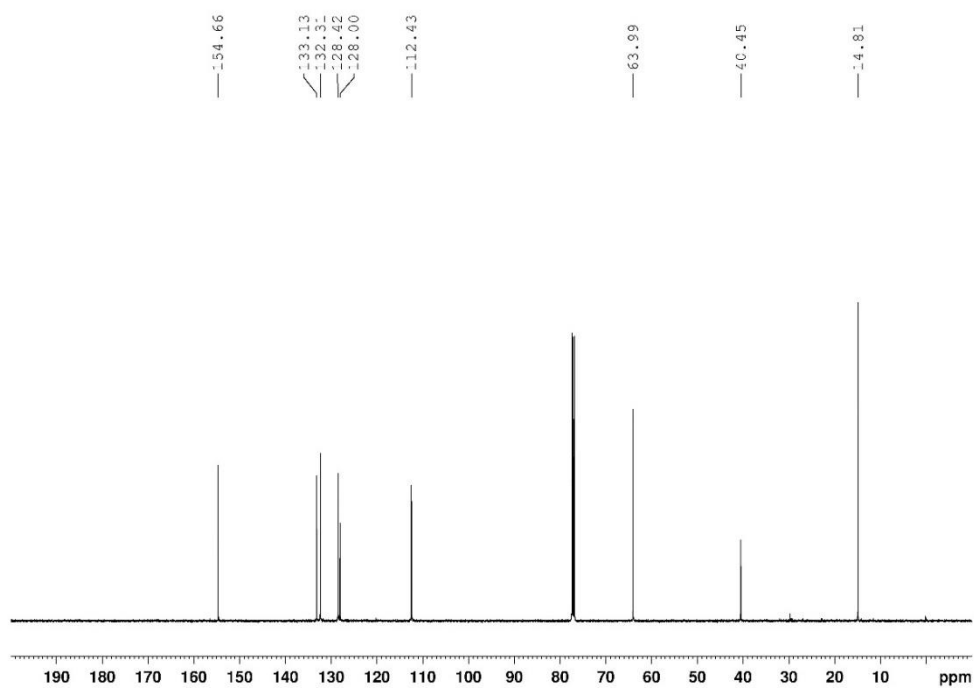

**Figure S4.**  $^{13}\text{C}$  NMR spectrum (125 MHz) of **2,2'-EtBP5** in  $\text{CDCl}_3$

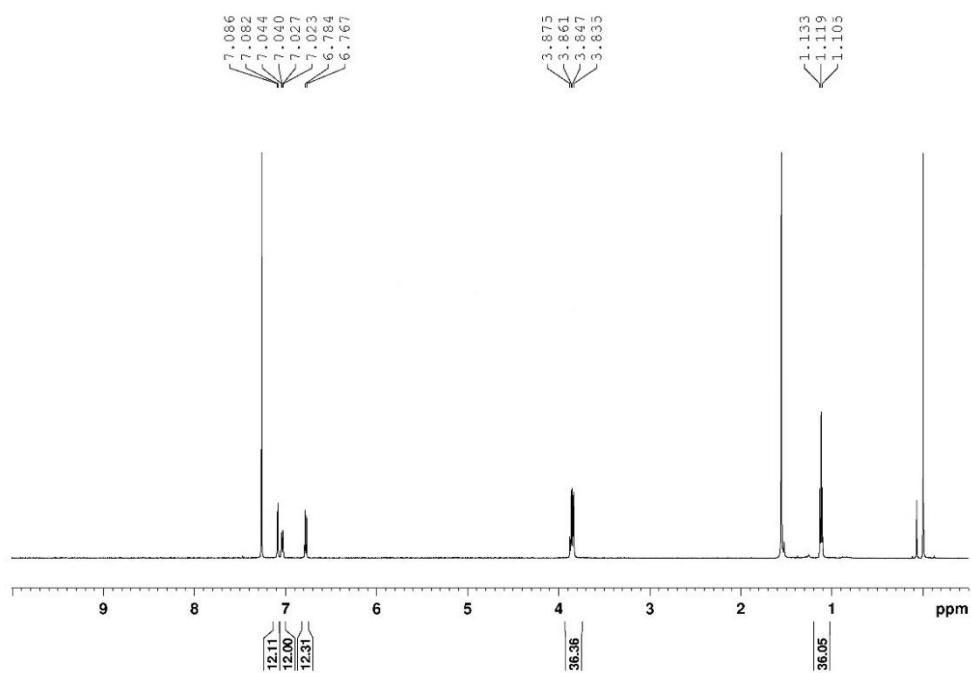

**Figure S5.**  $^1\text{H}$  NMR spectrum (500 MHz) of **2,2'-EtBP6** in  $\text{CDCl}_3$

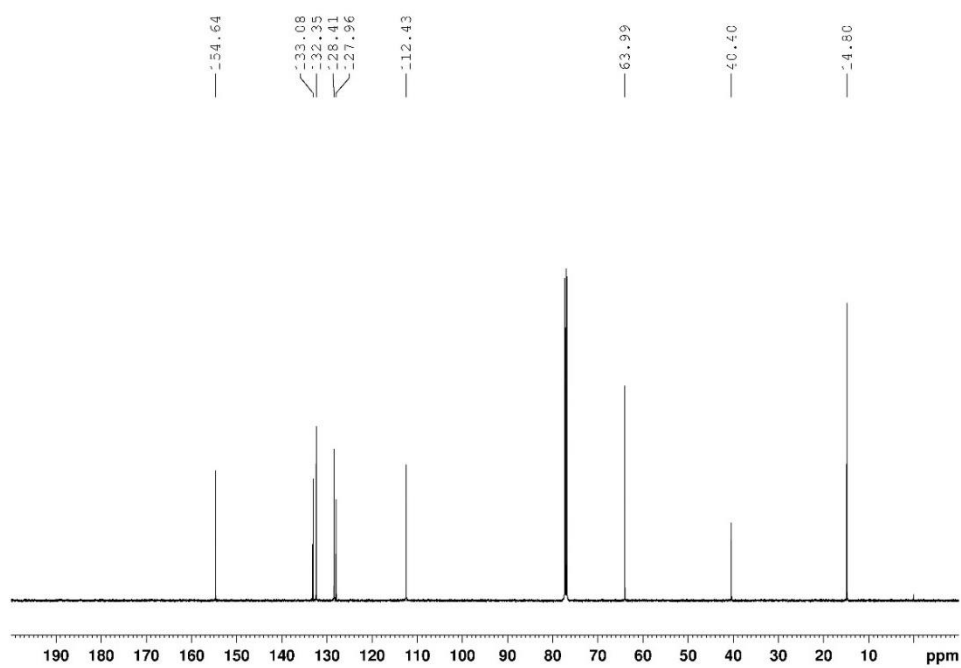

**Figure S6.**  $^{13}\text{C}$  NMR spectrum (125 MHz) of **2,2'-EtBP6** in  $\text{CDCl}_3$ .

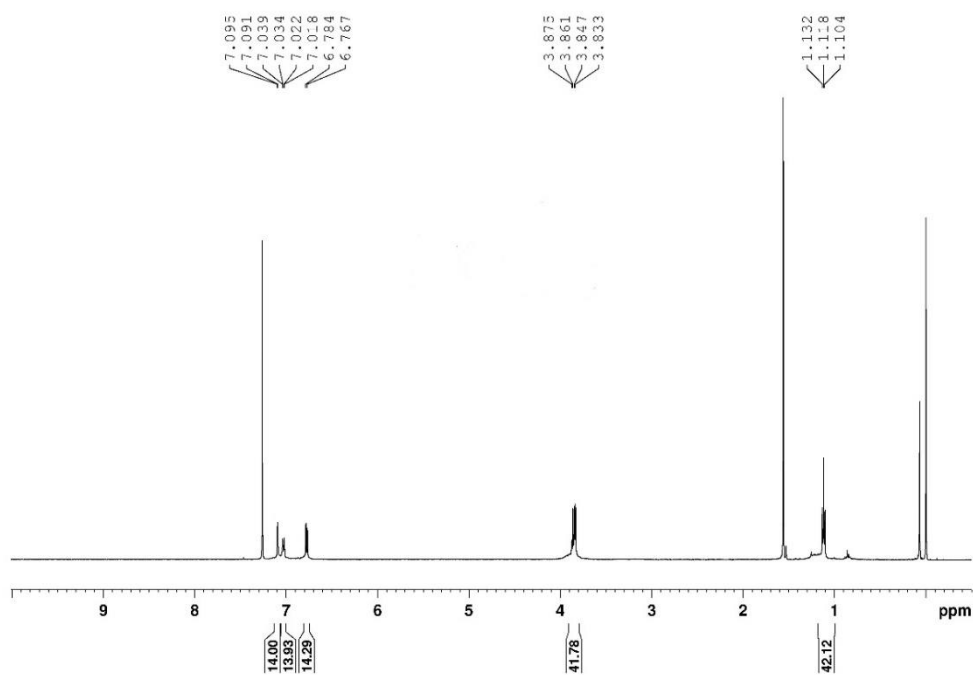

**Figure S7.**  $^1\text{H}$  NMR spectrum (500 MHz) of **2,2'-EtBP7** in  $\text{CDCl}_3$ .

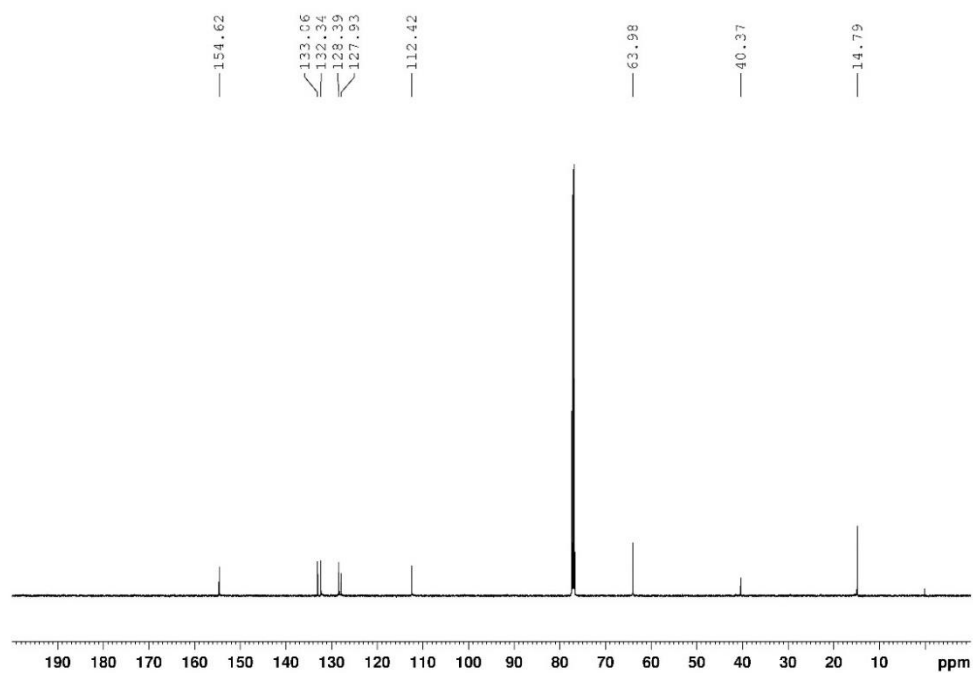

**Figure S8.**  $^{13}\text{C}$  NMR spectrum (125 MHz) of **2,2'-EtBP7** in  $\text{CDCl}_3$ .

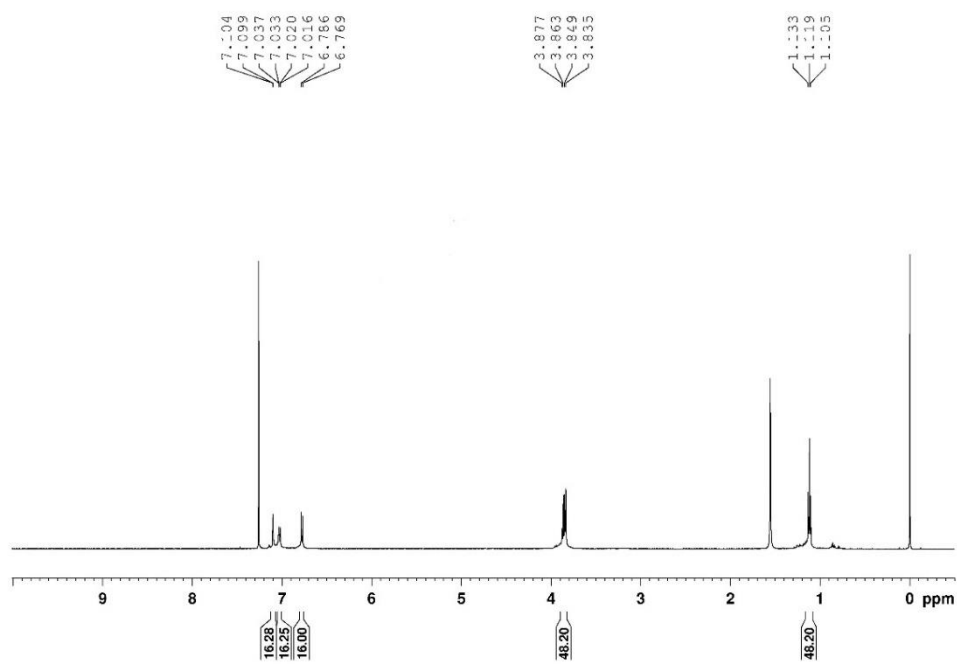

**Figure S9.**  $^1\text{H}$  NMR spectrum (500 MHz) of **2,2'-EtBP8** in  $\text{CDCl}_3$ .

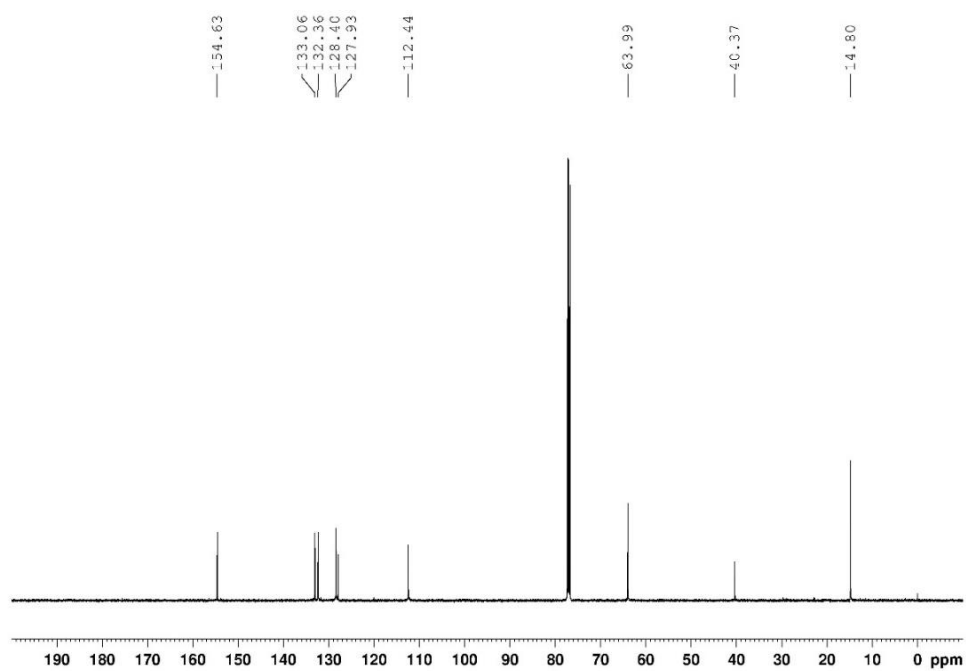

**Figure S10.**  $^{13}\text{C}$  NMR spectrum (125 MHz) of **2,2'-EtBP8** in  $\text{CDCl}_3$ .



**VT  $^1\text{H}$  NMR spectra of 2,2'-EtBP4 and 2,2'-EtBP8.**

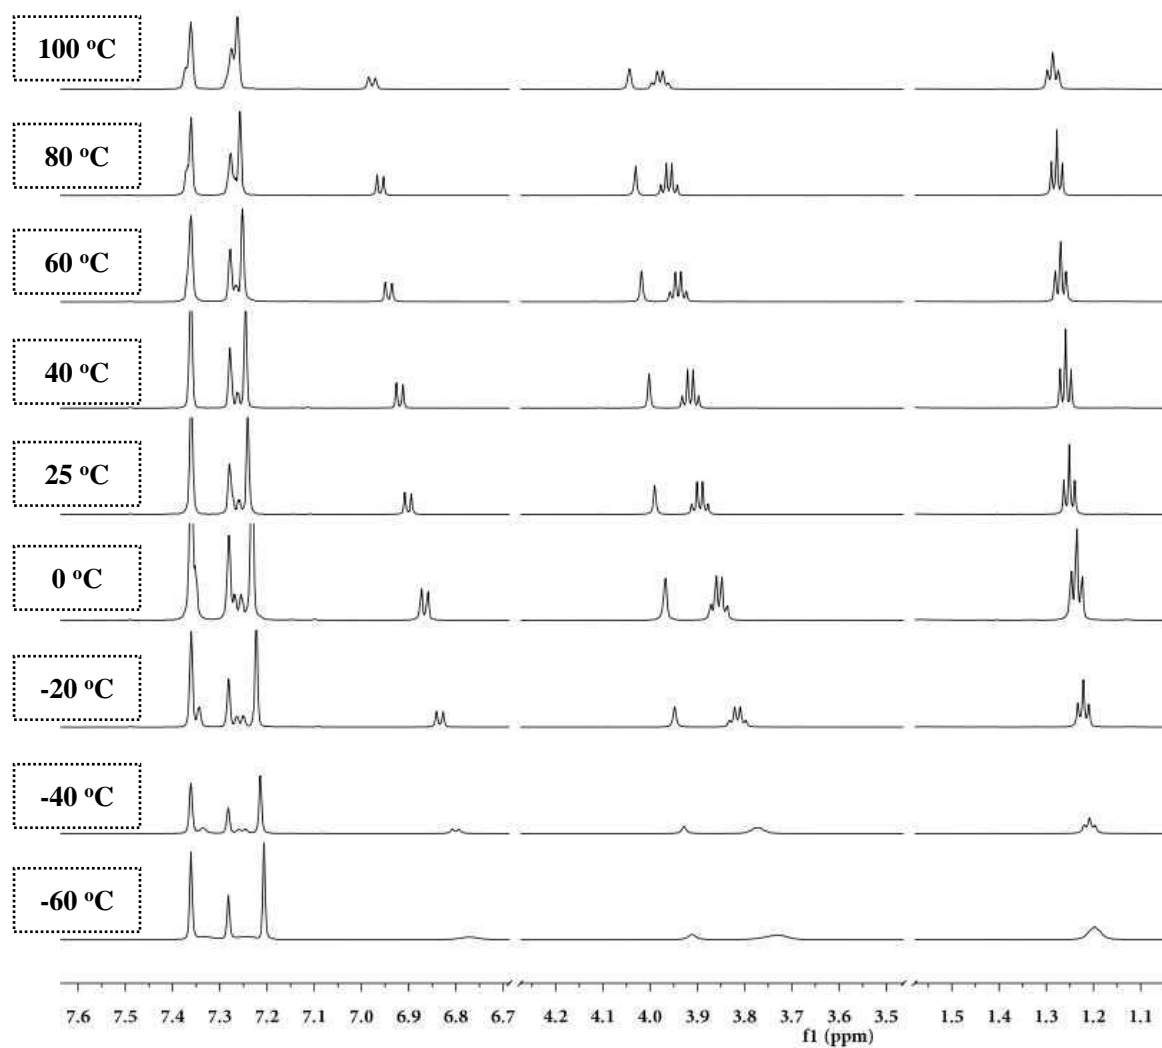

**Figure S11.** VT  $^1\text{H}$  NMR spectra of 2,2'-EtBP4 in  $\text{toluene-}d_8$  in the temperature range from  $-60\text{ }^\circ\text{C}$  to  $100\text{ }^\circ\text{C}$ .

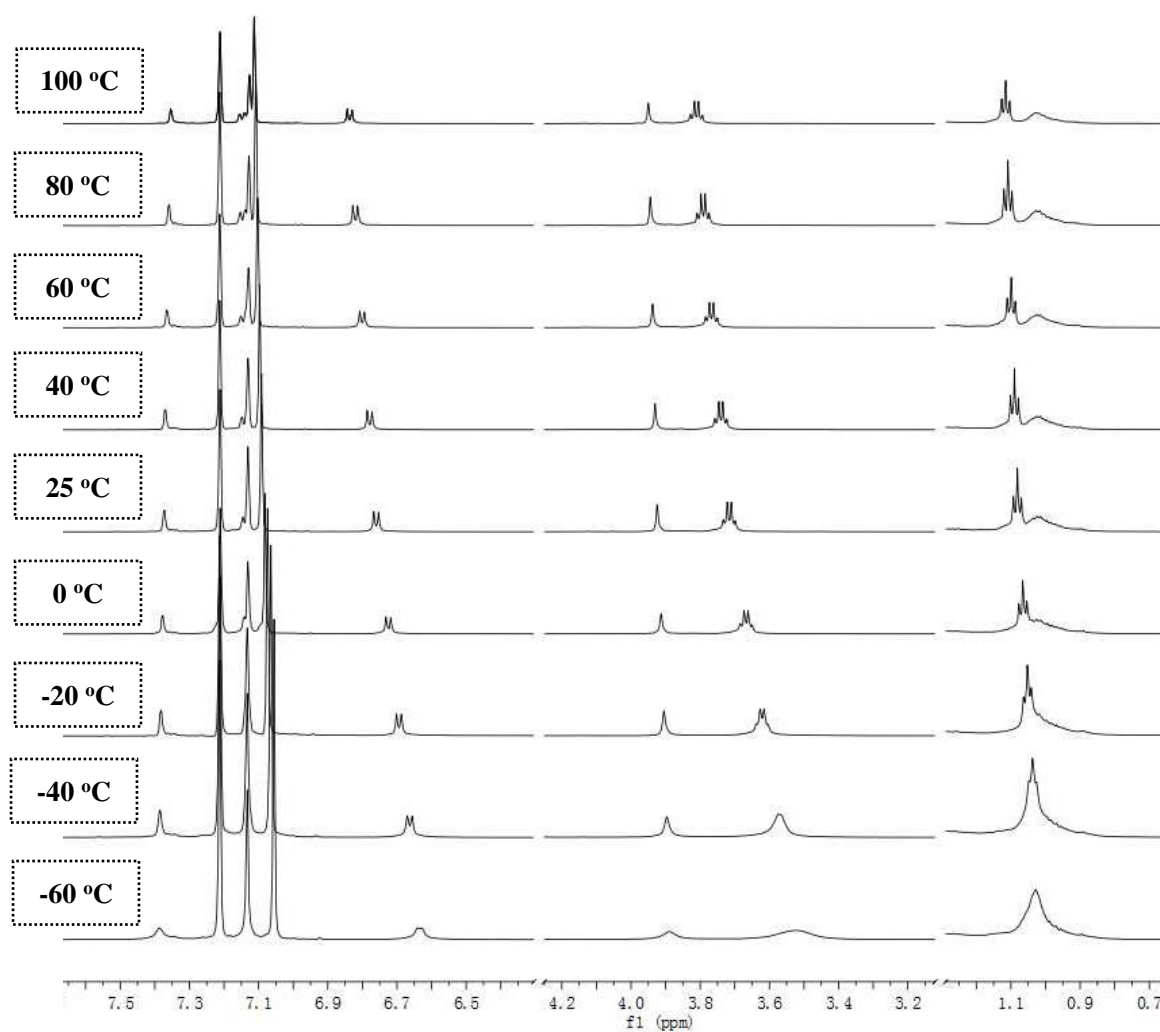

**Figure S12.** VT <sup>1</sup>H NMR spectra of **2,2'-EtBP8** in toluene-*d*<sub>8</sub> in the temperature range from -60 °C to 100 °C.

**Additional  $^1\text{H}$  NMR spectra of host-guest mixture.**

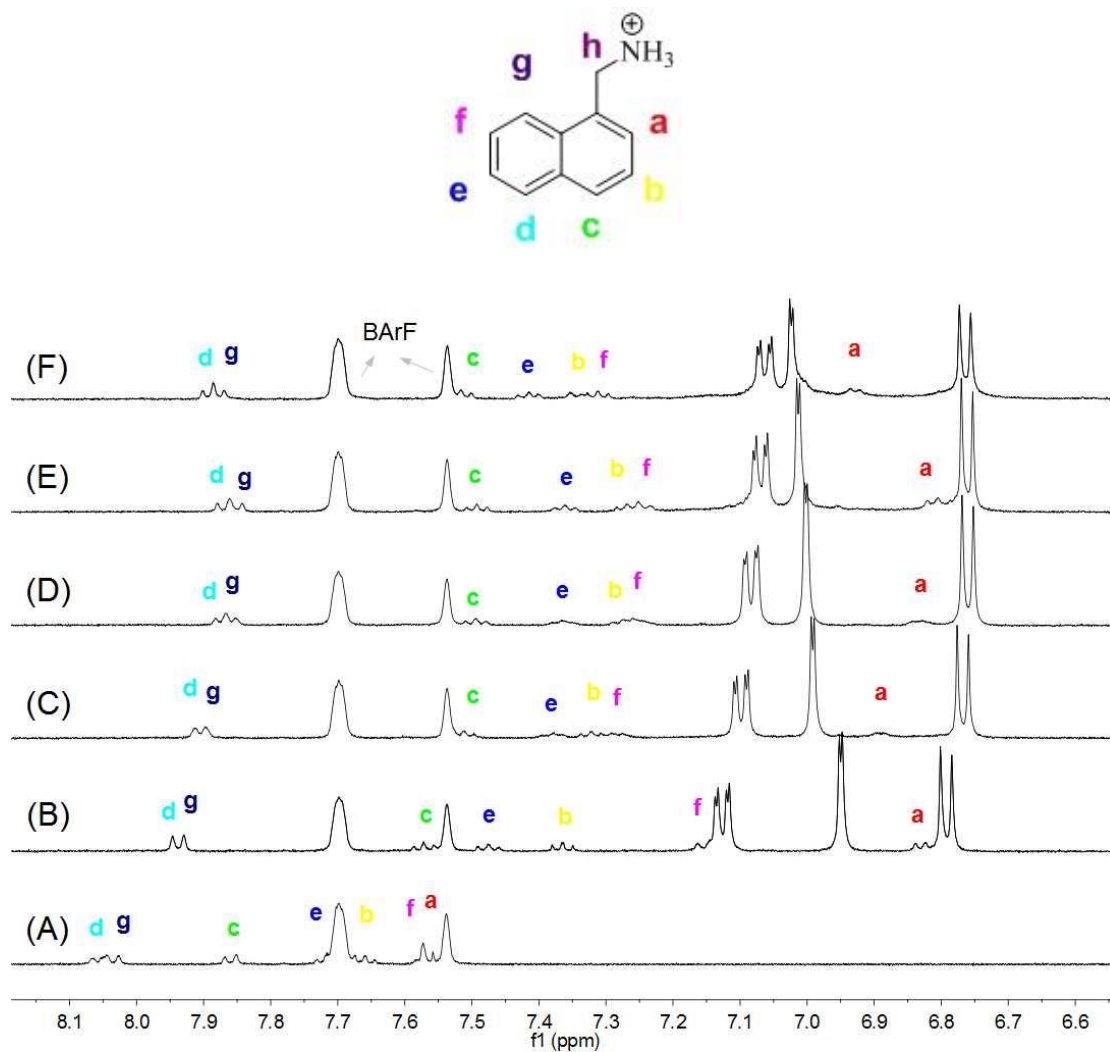

**Figure S13.**  $^1\text{H}$  NMR spectra (500 MHz, 298 K) of  $2^+$  (2.0 mM) in  $\text{CD}_2\text{Cl}_2$  in the absence (A) and presence of  $\sim 1.0$  equiv. of **2,2'-EtBP4** (B), **2,2'-EtBP5** (C), **2,2'-EtBP6** (D), **2,2'-EtBP7** (E), and **2,2'-EtBP8** (F).

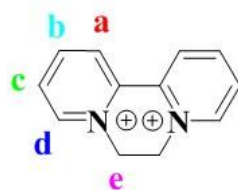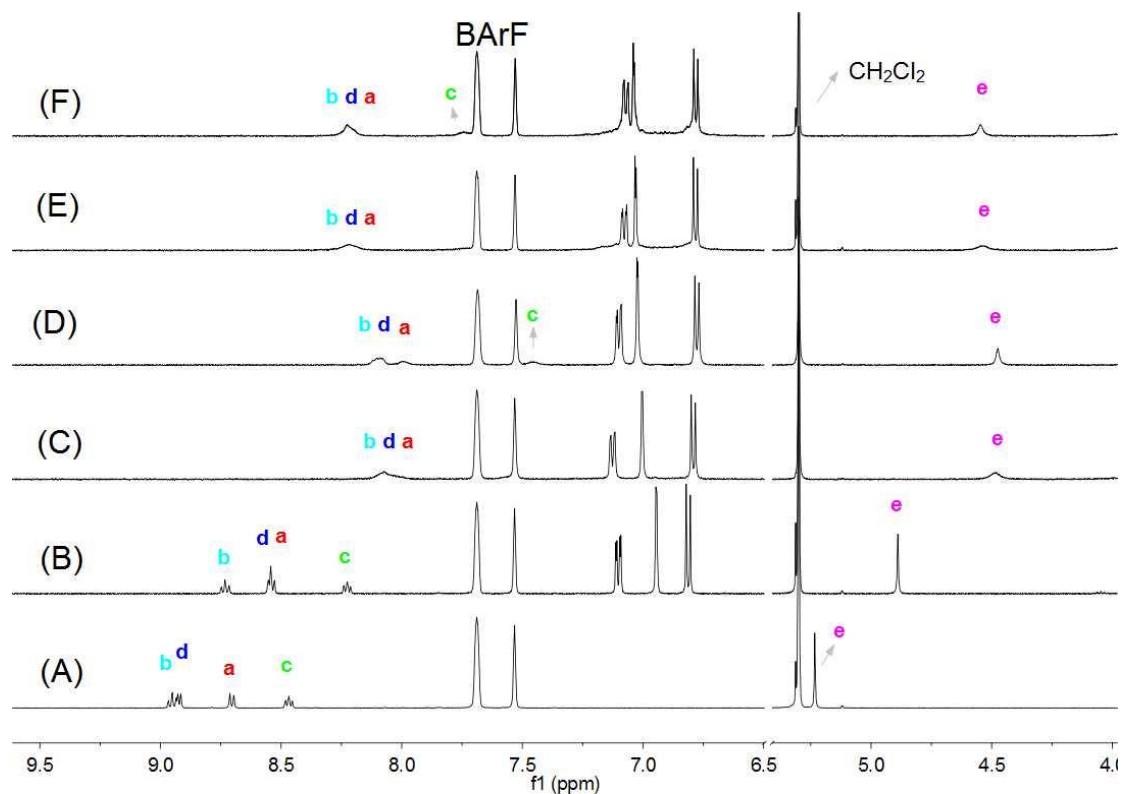

**Figure S14.** <sup>1</sup>H NMR spectra (500 MHz, 298 K) of  $3^{2+}$  (2.0 mM) in  $CD_2Cl_2$  in the absence (A) and presence of ~1.0 equiv. of **2,2'-EtBP4** (B), **2,2'-EtBP5** (C), **2,2'-EtBP6** (D), **2,2'-EtBP7** (E), and **2,2'-EtBP8** (F).

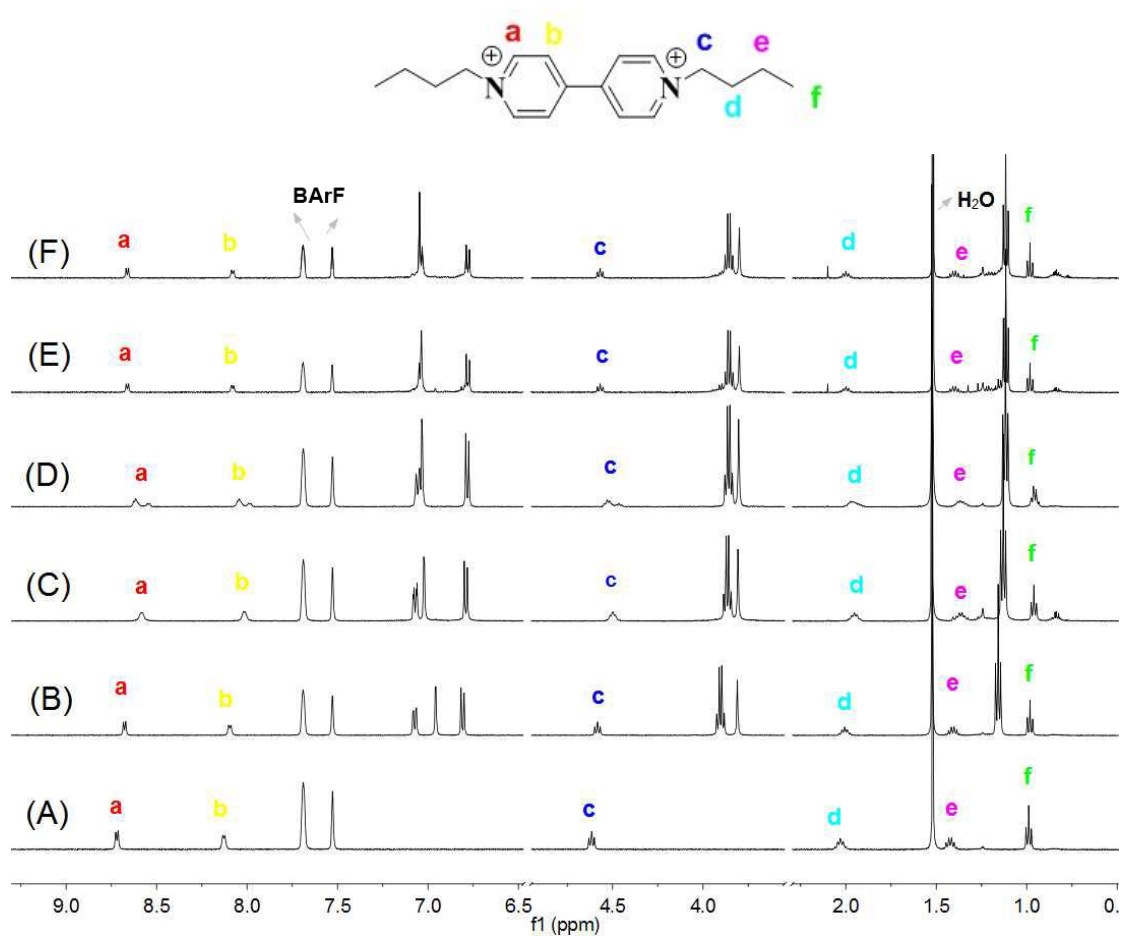

**Figure S15.**  $^1\text{H}$  NMR spectra (500 MHz, 298 K) of  $4^{2+}$  (2.0 mM) in  $\text{CD}_2\text{Cl}_2$  in the absence (A) and presence of  $\sim 1.0$  equiv. of **2,2'-EtBP4** (B), **2,2'-EtBP5** (C), **2,2'-EtBP6** (D), **2,2'-EtBP7** (E), and **2,2'-EtBP8** (F).

## Molar ratio plots and determination of $K_a$ .

In the present host-guest systems, chemical exchange is fast on the NMR time scale. To determine the association constants ( $K_a$ ),  $^1\text{H}$  NMR titrations were performed in  $\text{CD}_2\text{Cl}_2$  with solutions which had a constant concentration of 2,2'-EtBPn host and varying concentrations of guest. Assuming 1 : 1 binding stoichiometry between 2,2'-EtBPns and these guests, the  $K_a$  values could be calculated by analyzing the sequential changes in chemical shift changes of 2,2'-EtBPn host that occurred with changes in guest concentration by using the nonlinear curve-fitting method from the following equation<sup>[S2]</sup>:

$$A = (A_\infty/[H]_0) (0.5[G]_0 + 0.5([H]_0 + 1/K_a) - (0.5 ([G]_0^2 + (2[G]_0(1/K_a - [H]_0)) + (1/K_a + [H]_0)^2)^{0.5}))$$

Where  $A$  is the chemical shift change of aromatic protons on 2,2'-EtBPn host at  $[G]_0$ ,  $A_\infty$  is the chemical shift change when the host is completely complexed,  $[H]_0$  is the fixed initial concentration of the 2,2'-EtBPn host, and  $[G]_0$  is the initial concentration of guest.

For each host-guest pair examined, the plot of  $\Delta\delta$  as a function of  $[G]_0$  gave an excellent fit (Figure S16~S20), verifying the validity of the 1:1 binding stoichiometry assumed. Additionally, mole ratio plots were also made (Figure S21~25); they proved consistent with the proposed 1 : 1 host-guest binding stoichiometry.

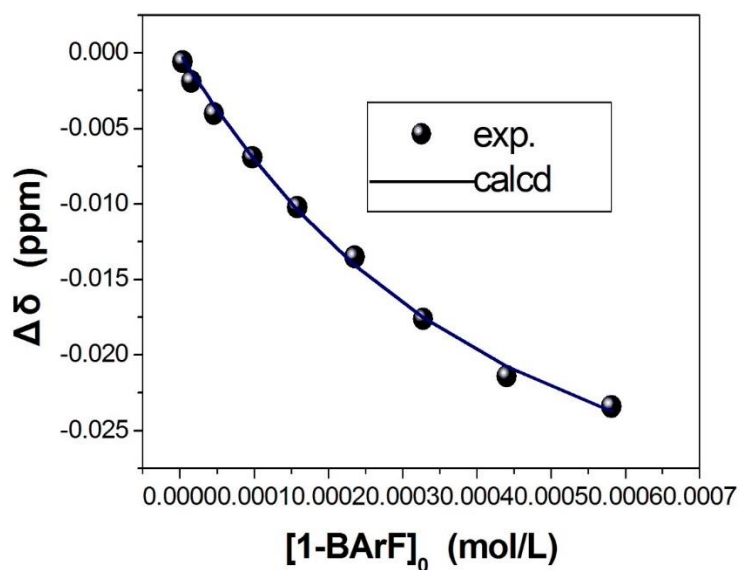

**Figure S16.** The non-linear curve-fitting (NMR titrations) for the complexation of **2,2'-EtBP4** ( $2.0 \times 10^{-4}$  mol/L) with and guest **1<sup>+</sup>** in  $\text{CD}_2\text{Cl}_2$  at 298 K.

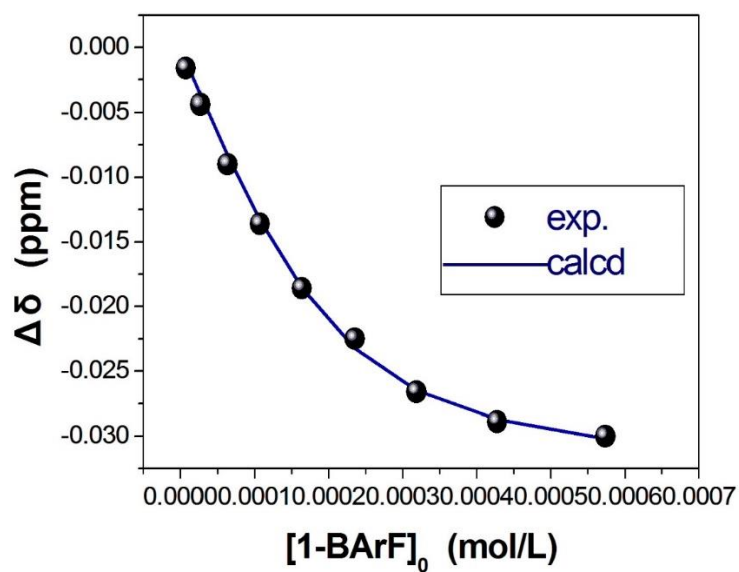

**Figure S17.** The non-linear curve-fitting (NMR titrations) for the complexation of **2,2'-EtBP5** ( $2.0 \times 10^{-4}$  mol/L) with and guest **1<sup>+</sup>** in  $\text{CD}_2\text{Cl}_2$  at 298 K.

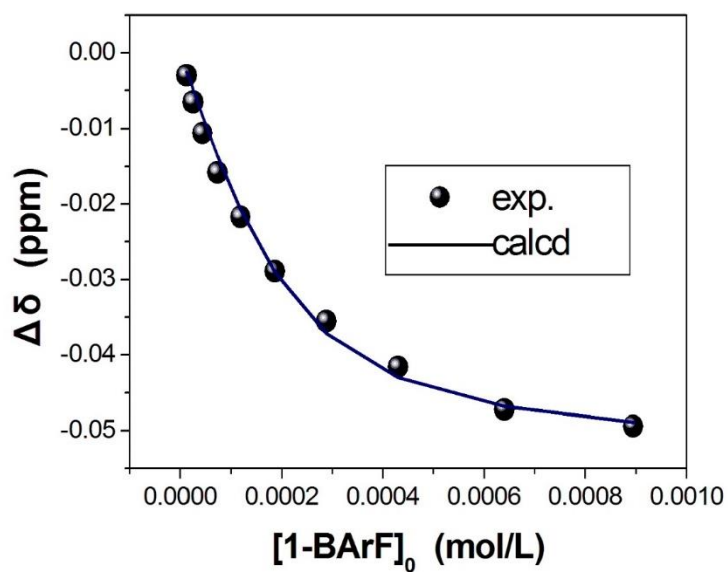

**Figure S18.** The non-linear curve-fitting (NMR titrations) for the complexation of **2,2'-EtBP6** ( $2.0 \times 10^{-4}$  mol/L) with and guest **1<sup>+</sup>** in  $\text{CD}_2\text{Cl}_2$  at 298 K.

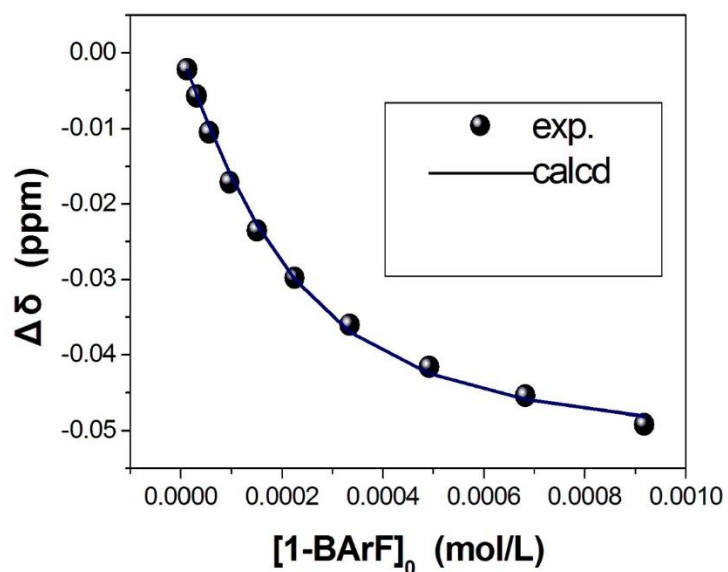

**Figure S19.** The non-linear curve-fitting (NMR titrations) for the complexation of **2,2'-EtBP7** ( $2.0 \times 10^{-4}$  mol/L) with and guest **1<sup>+</sup>** in  $\text{CD}_2\text{Cl}_2$  at 298 K.



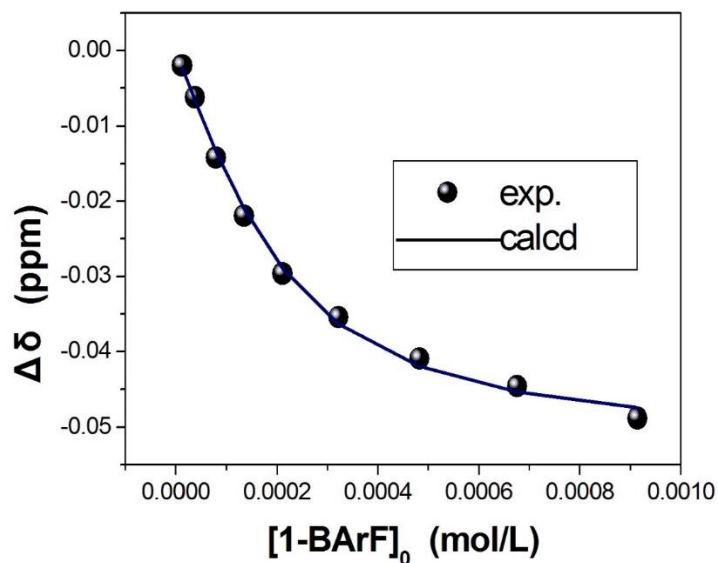

**Figure S20.** The non-linear curve-fitting (NMR titrations) for the complexation of **2,2'-EtBP8** ( $2.0 \times 10^{-4}$  mol/L) with and guest **1<sup>+</sup>** in  $\text{CD}_2\text{Cl}_2$  at 298 K.

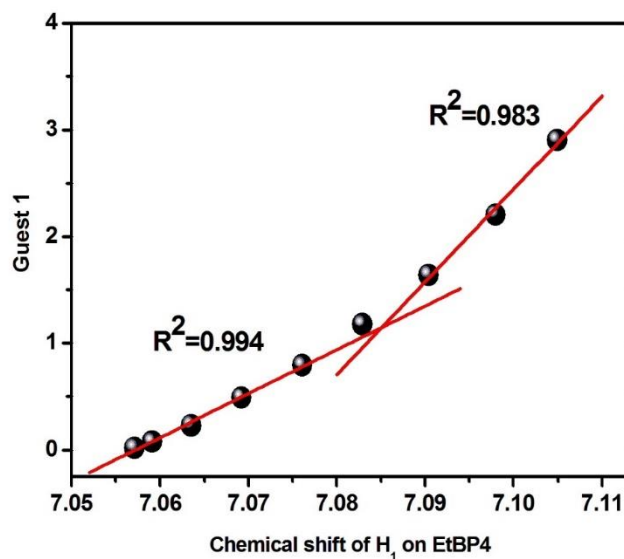

**Figure S21.** Mole ratio plot for **2,2'-EtBP4** and **1<sup>+</sup>** from  $^1\text{H}$  NMR (500 MHz, 298 K) experiments, wherein **2,2'-EtBP4** (at a fixed concentration) in  $\text{CD}_2\text{Cl}_2$  was treated different molar equivalents of **1<sup>+</sup>**. The results are consistent with a 1 : 1 binding stoichiometry.

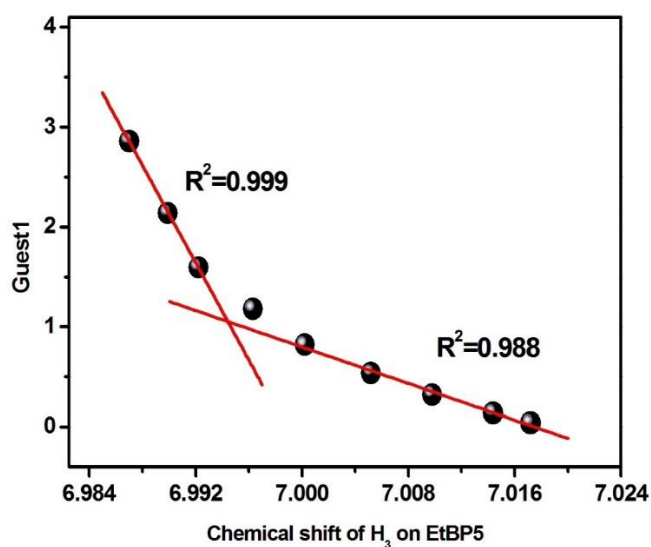

**Figure S22.** Mole ratio plot for **2,2'-EtBP5** and **1<sup>+</sup>** from <sup>1</sup>H NMR (500 MHz, 298 K) experiments, wherein **2,2'-EtBP5** (at a fixed concentration) in CD<sub>2</sub>Cl<sub>2</sub> was treated different molar equivalents of **1<sup>+</sup>**. The results are consistent with a 1 : 1 binding stoichiometry.

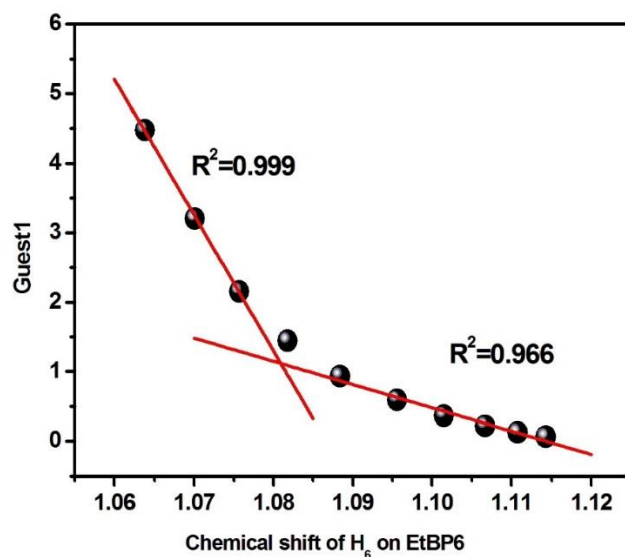

**Figure S23.** Mole ratio plot for **2,2'-EtBP6** and **1<sup>+</sup>** from <sup>1</sup>H NMR (500 MHz, 298 K) experiments, wherein **2,2'-EtBP6** (at a fixed concentration) in CD<sub>2</sub>Cl<sub>2</sub> was treated different molar equivalents of **1<sup>+</sup>**. The results are consistent with a 1 : 1 binding stoichiometry.

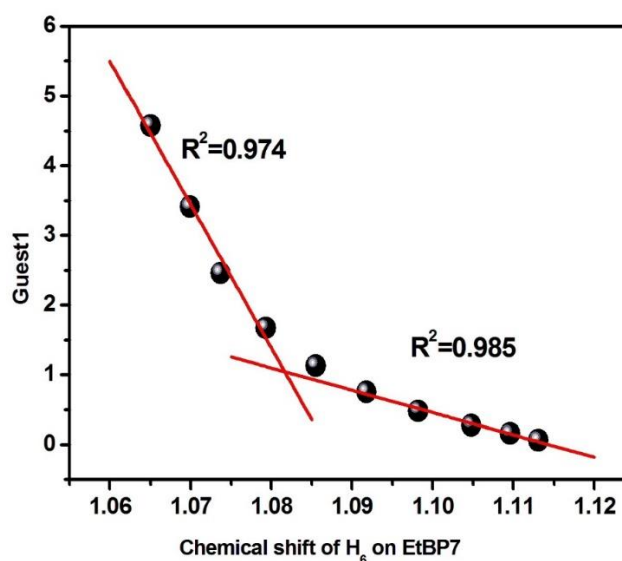

**Figure S24.** Mole ratio plot for **2,2'-EtBP7** and **1<sup>+</sup>** from <sup>1</sup>H NMR (500 MHz, 298 K) experiments, wherein **2,2'-EtBP7** (at a fixed concentration) in CD<sub>2</sub>Cl<sub>2</sub> was treated different molar equivalents of **1<sup>+</sup>**. The results are consistent with a 1 : 1 binding stoichiometry.

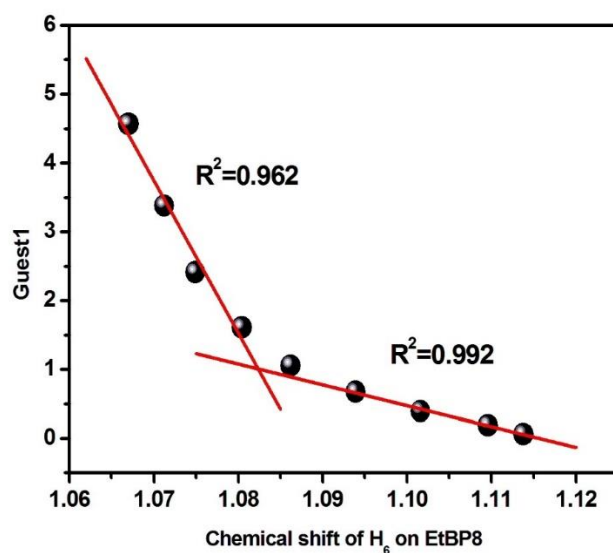

**Figure S25.** Mole ratio plot for **2,2'-EtBP8** and **1<sup>+</sup>** from <sup>1</sup>H NMR (500 MHz, 298 K) experiments, wherein **2,2'-EtBP8** (at a fixed concentration) in CD<sub>2</sub>Cl<sub>2</sub> was treated different molar equivalents of **1<sup>+</sup>**. The results are consistent with a 1 : 1 binding stoichiometry.

## References.

---

[S1] C. Li, X. Shu, J. Li, J. Fan, Z. Chen, L. Weng and X. Jia *Org. Lett.*, **2012**, *14*, 4126–4129.

[S2] a) K. A. Connors, *Binding Constants*; Wiley: New York, **1987**. Corbin, P. S. Ph.D. Dissertation, University of Illinois at Urbana-Champaign, Urbana, IL, 1999; b) R. P. Ashton, R. Ballardini, V. Balzani, M. Belohradsky, M. T. Gandolfi, D. Philp, L. Prodi, F. M. Raymo, M. V. Reddington, N. Spencer, J. F. Stoddart, M. Venturi, D. J. Williams, *J. Am. Chem. Soc.*, **1996**, *118*, 4931–4951; c) Y. Inoue, K. Yamamoto, T. Wada, S. Everitt, X.-M. Gao, Z.-J. Hou, L.-H. Tong, S.-K. Jiang, H.-M. Wu, *J. Chem. Soc., Perkin Trans. 2*, **1998**, 1807–1816.
